# Supplementary material for: Improved adsorption cooling performance of MIL-101(Cr)/GO composites by tuning the water adsorption rate
Source: Royal Society of Chemistry journal article supplement (doi:10.1039/d2se01508k), 2022-12-13
Supplement: d2se01508k1.pdf [file d2se01508k1.pdf]

## Supplementary Information for Improved Adsorption Cooling Performance of MIL-101(Cr)/GO Composites by Tuning Water Adsorption Rate

Xiaoxiao Xia<sup>1</sup> and Song Li,<sup>1,2\*</sup>

<sup>1</sup>Department of New Energy Science and Engineering, School of Energy and Power Engineering, Huazhong University of Science and Technology, Wuhan 430074, China.

<sup>2</sup>China-EU Institute for Clean and Renewable Energy, Huazhong University of Science and Technology, Wuhan 430074, China

Table S1. Fitting parameters of the universal adsorption isotherm model and the fitting parameters of modified LDF equation

| Adsorbent         | $\mu_i$      | $\varepsilon_{oi}$ (J/mol)         | $m_i$ (J/mol)         | $\kappa$              | $\beta$ |
|-------------------|--------------|------------------------------------|-----------------------|-----------------------|---------|
| MIL-101(Cr)       | $\mu_1=0.85$ | $\varepsilon_{o1}=1.86\times 10^3$ | $m_1=6.61\times 10^1$ | $4.604\times 10^{-4}$ | 0.696   |
|                   | $\mu_2=0.14$ | $\varepsilon_{o2}=2.87\times 10^3$ | $m_2=2.67\times 10^3$ |                       |         |
|                   | $\mu_3=0.01$ | $\varepsilon_{o3}=9.49\times 10^3$ | $m_3=1.38\times 10^2$ |                       |         |
| MIL-101(Cr)/GO-5  | $\mu_1=0.49$ | $\varepsilon_{o1}=1.88\times 10^3$ | $m_1=1.38\times 10^2$ | $2.015\times 10^{-3}$ | 1.138   |
|                   | $\mu_2=0.10$ | $\varepsilon_{o2}=6.27\times 10^3$ | $m_2=5.36\times 10^3$ |                       |         |
|                   | $\mu_3=0.41$ | $\varepsilon_{o3}=1.90\times 10^3$ | $m_3=4.99\times 10^1$ |                       |         |
| MIL-101(Cr)/GO-10 | $\mu_1=0.47$ | $\varepsilon_{o1}=1.87\times 10^3$ | $m_1=3.69\times 10^1$ | $2.344\times 10^{-3}$ | 1.203   |
|                   | $\mu_2=0.39$ | $\varepsilon_{o2}=1.89\times 10^3$ | $m_2=1.07\times 10^1$ |                       |         |
|                   | $\mu_3=0.14$ | $\varepsilon_{o3}=3.76\times 10^3$ | $m_3=3.57\times 10^3$ |                       |         |
| MIL-101(Cr)/GO-15 | $\mu_1=0.42$ | $\varepsilon_{o1}=1.84\times 10^3$ | $m_1=8.26\times 10^1$ | $2.633\times 10^{-3}$ | 1.191   |
|                   | $\mu_2=0.13$ | $\varepsilon_{o2}=3.26\times 10^3$ | $m_2=2.97\times 10^3$ |                       |         |
|                   | $\mu_3=0.45$ | $\varepsilon_{o3}=1.89\times 10^3$ | $m_3=2.41\times 10^1$ |                       |         |

|                   |              |                                    |                       |                       |       |
|-------------------|--------------|------------------------------------|-----------------------|-----------------------|-------|
|                   | $\mu_1=0.80$ | $\varepsilon_{o1}=1.96\times 10^3$ | $m_1=5.63\times 10^1$ |                       |       |
| MIL-101(Cr)/GO-20 | $\mu_2=0.14$ | $\varepsilon_{o2}=1.47\times 10^3$ | $m_2=4.12\times 10^2$ | $2.698\times 10^{-3}$ | 1.209 |
|                   | $\mu_3=0.06$ | $\varepsilon_{o3}=6.58\times 10^3$ | $m_3=2.16\times 10^3$ |                       |       |
|                   | $\mu_1=0.81$ | $\varepsilon_{o1}=1.91\times 10^3$ | $m_1=7.91\times 10^1$ |                       |       |
| MIL-101(Cr)/GO-35 | $\mu_2=0.05$ | $\varepsilon_{o2}=8.18\times 10^2$ | $m_2=2.81\times 10^1$ | $2.912\times 10^{-3}$ | 1.121 |
|                   | $\mu_3=0.14$ | $\varepsilon_{o3}=3.12\times 10^3$ | $m_3=1.52\times 10^3$ |                       |       |

Table S2. True density ( $\rho_t$ ), bulk density ( $\rho_b$ ) and porosity ( $\varphi$ ) for MIL-101(Cr)/GO and MIL-101(Cr)

| Adsorbent         | $\rho_t$ (g/cm <sup>3</sup> ) | $\rho_b$ (g/cm <sup>3</sup> ) | $\varphi$             |
|-------------------|-------------------------------|-------------------------------|-----------------------|
| MIL-101(Cr)       | 1.303 ( $\pm$ 0.0383)         | 0.182 ( $\pm$ 0.0094)         | 0.860 ( $\pm$ 0.0113) |
| MIL-101(Cr)/GO-5  | 1.305 ( $\pm$ 0.0305)         | 0.190 ( $\pm$ 0.0102)         | 0.854 ( $\pm$ 0.0111) |
| MIL-101(Cr)/GO-10 | 1.310 ( $\pm$ 0.0339)         | 0.179 ( $\pm$ 0.0076)         | 0.863 ( $\pm$ 0.0093) |
| MIL-101(Cr)/GO-15 | 1.321 ( $\pm$ 0.0293)         | 0.174 ( $\pm$ 0.0084)         | 0.868 ( $\pm$ 0.0092) |
| MIL-101(Cr)/GO-20 | 1.329 ( $\pm$ 0.0358)         | 0.170 ( $\pm$ 0.0072)         | 0.872 ( $\pm$ 0.0090) |
| MIL-101(Cr)/GO-35 | 1.340 ( $\pm$ 0.0392)         | 0.159 ( $\pm$ 0.0078)         | 0.881 ( $\pm$ 0.0093) |
